# Supplementary material for: Hypercholesterolemia in the Malaysian Cohort Participants: Genetic and Non-Genetic Risk Factors
Source: MDPI journal article supplement (doi:10.3390/genes14030721), 2023-03-15
Supplement: s1 [file s1]

**Supplementary tables****Supplementary Table S1.** Summary of the 25 hypercholesterolemic (HDL) individuals for whole-exome sequencing.

Based on the Simon Broome's criteria, the cut-off point for hypercholesterolemia are the low-density lipoprotein C (LDL-C) level (>4.9 mmol/L and total cholesterol (TC) level (>7.5 mmol/L).

| Sample Name | Sample ID  | Age (years) | Gender | TC (mmol/L) | LDL-C (mmol/L) |
|-------------|------------|-------------|--------|-------------|----------------|
| H12         | 1811080107 | 50          | Male   | 10.92       | 7.70           |
| H3          | 511080024  | 62          | Female | 10.60       | 7.79           |
| H22         | 1001111011 | 48          | Male   | 11.12       | 8.62           |
| H39         | 605123137  | 59          | Female | 10.65       | 8.74           |
| H40         | 1305122033 | 36          | Female | 11.22       | 8.76           |
| H43         | 1006122103 | 49          | Female | 11.33       | 8.84           |
| H37         | 104122038  | 46          | Female | 10.96       | 8.88           |
| H46         | 3007123035 | 50          | Male   | 10.67       | 9.00           |
| H2          | 211083117  | 46          | Male   | 11.14       | 9.15           |
| H35         | 912103030  | 49          | Male   | 11.30       | 9.20           |
| H45         | 2806122134 | 43          | Male   | 11.18       | 9.22           |
| H32         | 1209112009 | 59          | Female | 11.92       | 9.37           |
| H8          | 1006080015 | 54          | Male   | 11.25       | 9.61           |
| H21         | 1101111003 | 51          | Male   | 17.04       | 9.64           |
| H48         | 2509122027 | 61          | Male   | 11.97       | 9.96           |
| H29         | 1107110011 | 60          | Female | 13.07       | 10.01          |
| H16         | 1507100009 | 62          | Female | 11.86       | 10.13          |
| H9          | 1706081005 | 62          | Male   | 12.65       | 10.64          |
| H25         | 2706110012 | 50          | Female | 13.01       | 10.75          |
| H33         | 2810103001 | 51          | Male   | 12.63       | 10.90          |
| H15         | 1507100010 | 43          | Female | 12.73       | 11.00          |
| H14         | 1307100008 | 57          | Female | 13.78       | 11.76          |
| H31         | 2601115108 | 48          | Female | 14.19       | 12.07          |
| H18         | 1110103020 | 58          | Female | 16.80       | 14.68          |
| H17         | 2907100031 | 50          | Female | 18.01       | 16.09          |

**Supplementary Table S2.** Summary of the 25 normal (LLDL) individuals for whole-exome sequencing. Based on the Simon Broome's criteria, the cut-off point for hypercholesterolemia are the low-density lipoprotein C (LDL-C) level (<5.2 mmol/L and total cholesterol (TC) level (2.6–3.4 mmol/L).

| Sample | Sample ID (TMC) | Age (years) | Gender | TC<br>(mmol/L) | LDL-C<br>(mmol/L) |
|--------|-----------------|-------------|--------|----------------|-------------------|
| L14    | 808105116       | 38          | Male   | 2.66           | 0.45              |
| L49    | 1508123006      | 41          | Male   | 2.43           | 0.64              |
| L27    | 2305111037      | 43          | Male   | 2.54           | 0.80              |
| L26    | 3101113010      | 62          | Male   | 3.01           | 0.81              |
| L38    | 1204120025      | 59          | Male   | 2.25           | 0.82              |
| L19    | 703111020       | 39          | Male   | 2.42           | 0.86              |
| L11    | 1507101017      | 49          | Female | 2.45           | 0.87              |
| L2     | 1606080132      | 55          | Female | 2.98           | 0.92              |
| L24    | 405111026       | 54          | Male   | 2.68           | 0.98              |
| L50    | 3003111037      | 36          | Female | 2.96           | 1.05              |
| L46    | 2605123110      | 54          | Male   | 2.78           | 1.15              |
| L28    | 3005116127      | 43          | Male   | 2.49           | 1.20              |
| L45    | 2005122013      | 53          | Male   | 2.92           | 1.20              |
| L23    | 2103115106      | 47          | Female | 2.84           | 1.23              |
| L13    | 2807100022      | 57          | Male   | 2.83           | 1.25              |
| L42    | 1604120013      | 49          | Female | 3.01           | 1.26              |
| L43    | 1604121009      | 59          | Male   | 3.04           | 1.26              |
| L9     | 2406103122      | 61          | Male   | 3.01           | 1.30              |
| L39    | 1704120005      | 53          | Male   | 2.55           | 1.37              |
| L4     | 412080030       | 48          | Female | 2.98           | 1.38              |
| L25    | 1105116134      | 51          | Male   | 2.89           | 1.44              |
| L40    | 1904123116      | 47          | Female | 2.85           | 1.55              |
| L8     | 1208071049      | 53          | Female | 2.91           | 1.73              |
| L35    | 3101121004      | 60          | Male   | 2.98           | 1.83              |
| L10    | 1507100008      | 52          | Female | 2.58           | 1.85              |

**Supplementary Table S3.** Summary of the 27 causative variants that were chosen for validation in 677 individuals.

| Gene           | Exon | Base change                   | Amino acid change | SIFT prediction | Polyphen2 prediction | snp138       | Clinical Significance (ClinVar) | Frequency in HLDL, n | Frequency in LDL, n |
|----------------|------|-------------------------------|-------------------|-----------------|----------------------|--------------|---------------------------------|----------------------|---------------------|
| <i>APOB</i>    | 26   | NM_000384.3:c.A5768G          | H1923R            | Deleterious     | Damaging             | rs533617     | Benign/Likely benign            | 1                    | 0                   |
| <i>APOB</i>    | 26   | NM_000384.3:c.G4796A          | R1599H            | Deleterious     | Damaging             | rs746414462  | Conflicting pathogenicity       | 1                    | 0                   |
| <i>APOB</i>    | 23   | NM_000384.3:c.C3665T          | T12221            | Deleterious     | Damaging             | rs1333175181 | -                               | 1                    | 0                   |
| <i>APOB</i>    | 11   | NM_000384.3:c.C1400G          | A467G             | Deleterious     | Damaging             | rs376602710  | Uncertain significance          | 1                    | 0                   |
| <i>LDLR</i>    | 2    | NM_000527.5:c.A173G           | E58G              | Deleterious     | Damaging             | rs879254424  | Likely pathogenic               | 1                    | 0                   |
| <i>LDLR</i>    | 3    | NM_000527.5:c.G301A           | E101K             | Deleterious     | Damaging             | rs144172724  | Pathogenic/Likely pathogenic    | 1                    | 0                   |
| <i>LDLR</i>    | 3    | NM_000527.5:c.G622A           | E208K             | Tolerated       | Damaging             | rs879254597  | Pathogenic/Likely pathogenic    | 1                    | 0                   |
| <i>LDLR</i>    | 7    | NM_000527.5:c.C1284G          | N428K             | Deleterious     | Possible Damaging    | rs368708058  | Uncertain significance          | 1                    | 0                   |
| <i>LDLR</i>    | 12   | NM_000527.5:c.T2037A          | Y679X             | -               | -                    | rs760436036  | Pathogenic                      | 2                    | 0                   |
| <i>LDLRAP1</i> | 1    | NM_015627.3:c.603_604del      | 201_202del        | -               | -                    | -            | -                               | 2                    | 0                   |
| <i>PCSK9</i>   | 1    | NM_174936.4:c.77_79CGC        | -                 | -               | -                    | -            | -                               | 1                    | 0                   |
| <i>PCSK9</i>   | 4    | NM_174936.4:c.G644A           | R215H             | Deleterious     | Damaging             | rs794728683  | Conflicting pathogenicity       | 1                    | 0                   |
| <i>CELSR2</i>  | 19   | NM_001408.3:c.C6517T          | R2173C            | Tolerated       | Damaging             | rs142780237  | -                               | 2                    | 0                   |
| <i>CELSR2</i>  | 20   | NM_001408.3:c.6756delC        | Y2252fs           | -               | -                    | -            | -                               | 2                    | 0                   |
| <i>CELSR2</i>  | 25   | NM_001408.3:c.7583delC        | A2528fs           | -               | -                    | -            | -                               | 4                    | 0                   |
| <i>DCPS</i>    | 5    | NM_014026.6:c.666delC         | C222fs            | -               | -                    | -            | -                               | 4                    | 0                   |
| <i>GPAA1</i>   | 5    | NM_003801.4:c.702delC         | S234fs            | -               | -                    | -            | -                               | 2                    | 0                   |
| <i>LPA</i>     | 27   | NM_005577.4:c.A4195C          | T1399P            | Deleterious     | Damaging             | rs41272110   | -                               | 2                    | 0                   |
| <i>MAF1</i>    | 6    | NM_032272.5:c.532delG         | G178fs            | -               | -                    | -            | -                               | 7                    | 0                   |
| <i>NYNRIN</i>  | 2    | NM_025081.3:c.171_173del      | 57_58del          | -               | -                    | -            | -                               | 1                    | 0                   |
| <i>OPLAH</i>   | 27   | NM_017570.5:c.3668delA        | N1223fs           | -               | -                    | -            | -                               | 2                    | 0                   |
| <i>OPLAH</i>   | 16   | NM_017570.5:c.2189_2195GCCCCA | -                 | -               | -                    | -            | -                               | 4                    | 0                   |

|               |   |                            |            |             |          |             |   |   |   |
|---------------|---|----------------------------|------------|-------------|----------|-------------|---|---|---|
| <i>OSBPL7</i> | 7 | NM_145798.3:c.651_652del   | 217_218del | -           | -        | -           | - | 5 | 0 |
| <i>OSBPL7</i> | 4 | NM_145798.3:c.348_352ACCCT | -          | -           | -        | -           | - | 2 | 0 |
| <i>PARP10</i> | 1 | NM_032789.5:c.146delG      | G49fs      | -           | -        | -           | - | 4 | 0 |
| <i>SPATC1</i> | 5 | NM_198572.3:c.C1504A       | Q502K      | Deleterious | Damaging | rs201925917 | - | 2 | 0 |
| <i>TOMM40</i> | 1 | NM_001128917.2:c.240delG   | P80fs      | -           | -        | -           | - | 2 | 0 |

---

**Abbreviations:** LDL-C; low density lipoprotein, HDL; high LDL-C group, LLDL; low LDL-C group.

**Supplementary Table S4.** Summary of the 18 protective variants that were chosen for validation in 677 individuals.

| Gene           | Exon | Base change              | Amino acid change | SIFT prediction | Polyphen2 prediction | snp138      | Clinical Significance (ClinVar) | Frequency in HLDL, n | Frequency in LLDL, n |
|----------------|------|--------------------------|-------------------|-----------------|----------------------|-------------|---------------------------------|----------------------|----------------------|
| <i>APOB</i>    | 25   | NM_000384.3:c.G4163A     | R1388H            | Tolerated       | Benign               | rs13306187  | Conflicting pathogenicity       | 0                    | 2                    |
| <i>APOB</i>    | 26   | NM_000384.3:c.G7331A     | R2444H            | Tolerated       | Benign               | rs200143030 | Conflicting pathogenicity       | 0                    | 2                    |
| <i>LDLR</i>    | 2    | NM_000527.5:c.81C>T      | C27=              | -               | -                    | rs2228671   | Benign                          | 1                    | 3                    |
| <i>LDLR</i>    | 3    | NM_000527.5:c.*141=      | 3 Prime UTR       | -               | -                    | rs875989890 | Benign                          | 1                    | 5                    |
| <i>LDLRAP1</i> | 1    | NM_015627.3:c.T604C      | S202P             | Tolerated       | Benign               | rs6687605   | Benign                          | 5                    | 9                    |
| <i>PCSK9</i>   | 1    | NM_174936.4:c.83delC     | A28fs             | -               | -                    | -           | -                               | 0                    | 2                    |
| <i>PCSK9</i>   | 2    | NM_174936.4:c.C277T      | R93C              | Tolerated       | Damaging             | rs151193009 | Conflicting pathogenicity       | 0                    | 3                    |
| <i>CELSR2</i>  | 1    | NM_001408.3:c.1505delC   | A502fs            | -               | -                    | -           | -                               | 0                    | 2                    |
| <i>CELSR2</i>  | 8    | NM_001408.3:c.G4799C     | C1600S            | Deleterious     | Damaging             | -           | -                               | 2                    | 4                    |
| <i>LPA</i>     | 21   | NM_005577.4:c.3148delG   | G1050fs           | -               | -                    | -           | -                               | 0                    | 4                    |
| <i>LPA</i>     | 37   | NM_005577.4:c.A5673G     | I1891M            | Deleterious     | Damaging             | rs3798220   | Benign                          | 0                    | 3                    |
| <i>LPA</i>     | 40   | NM_005577.4:c.C6046T     | R2016C            | Tolerated       | Damaging             | rs3124784   | -                               | 4                    | 8                    |
| <i>MAF1</i>    | 7    | NM_032272.5:c.G707A      | G236E             | Tolerated       | Benign               | -           | -                               | 4                    | 7                    |
| <i>NYNRIN</i>  | 2    | NM_025081.3:c.168_169del | 56_57del          | -               | -                    | -           | -                               | 0                    | 2                    |
| <i>NYNRIN</i>  | 3    | NM_025081.3:c.A823G      | S275G             | Tolerated       | Benign               | rs74036628  | -                               | 4                    | 7                    |
| <i>NYNRIN</i>  | 4    | NM_025081.3:c.2249delG   | G750fs            | -               | -                    | -           | -                               | 0                    | 2                    |
| <i>PARP10</i>  | 3    | NM_032789.5:c.283delG    | D95fs             | -               | -                    | -           | -                               | 0                    | 2                    |
| <i>SPATC1</i>  | 1    | NM_198572.3:c.T193C      | S56P              | Tolerated       | Benign               | rs60050811  | -                               | 0                    | 2                    |

\* **Abbreviations:** LDL-C; low density lipoprotein, HLDL; high LDL-C group, LLDL; low LDL-C group.

**Supplementary Table S5.** Summary of the 76 causative variants in 25 of tier-2 genes identified from whole-exome sequencing.

| Gene          | Variant Type               | Nucleotide and amino acid changes | SIFT prediction | Polyphen2 prediction | snp138      | Clinical Significance (ClinVar) | Sample IDs      | Frequency in HLDL, n | Frequency in LLDL, n |
|---------------|----------------------------|-----------------------------------|-----------------|----------------------|-------------|---------------------------------|-----------------|----------------------|----------------------|
| <i>ABCG8</i>  | frameshift deletion        | NM_022437.3:c.690delC;p.N230fs    | -               | -                    | -           |                                 | H32             | 1                    | 0                    |
| <i>ABCG8</i>  | nonsynonymous SNV          | NM_022437.3:c.C154T;p.L52F        | Deleterious     | Damaging             | rs142250628 | Benign                          | H40             | 1                    | 0                    |
| <i>ABO</i>    | nonsynonymous SNV          | NM_020469.3:c.A259G;p.T87A        | -               | -                    | rs77641731  | -                               | H8              | 1                    | 0                    |
| <i>APOC1</i>  | frameshift deletion        | NM_001645.5:c.71delC;p.A24fs,     | -               | -                    | -           | -                               | H22             | 1                    | 0                    |
| <i>CELSR2</i> | frameshift deletion        | NM_001408.3:c.7583delC;p.A2528fs  | -               | -                    | -           | -                               | H17;H29;H31;H35 | 4                    | 0                    |
| <i>CELSR2</i> | frameshift deletion        | NM_001408.3:c.6756delC;p.Y2252fs  | -               | -                    | -           | -                               | H25;H9          | 2                    | 0                    |
| <i>CELSR2</i> | nonsynonymous SNV          | NM_001408.3:c.C6517T;p.R2173C     | Tolerated       | Damaging             | rs142780237 | -                               | H15;H16         | 2                    | 0                    |
| <i>CELSR2</i> | frameshift deletion        | NM_001408.3:c.2991delG;p.Q997fs   | -               | -                    | -           | -                               | H48             | 1                    | 0                    |
| <i>CELSR2</i> | frameshift deletion        | NM_001408.3:c.1412delC;p.T471fs   | -               | -                    | -           | -                               | H25             | 1                    | 0                    |
| <i>CELSR2</i> | frameshift deletion        | NM_001408.3:c.8721delG;p.V2907fs  | -               | -                    | -           | -                               | H8              | 1                    | 0                    |
| <i>CELSR2</i> | frameshift deletion        | NM_001408.3:c.8463delG;p.E2821fs  | -               | -                    | -           | -                               | H8              | 1                    | 0                    |
| <i>CELSR2</i> | frameshift deletion        | NM_001408.3:c.6341delC;p.A2114fs  | -               | -                    | -           | -                               | H43             | 1                    | 0                    |
| <i>CELSR2</i> | frameshift deletion        | NM_001408.3:c.7631delC;p.A2544fs  | -               | -                    | -           | -                               | H29             | 1                    | 0                    |
| <i>CELSR2</i> | frameshift deletion        | NM_001408.3:c.6583delC;p.P2195fs  | -               | -                    | -           | -                               | H14             | 1                    | 0                    |
| <i>CELSR2</i> | nonframeshift substitution | NM_001408.3:c.7630_7631GG         | -               | -                    | -           | -                               | H29             | 1                    | 0                    |
| <i>DCPS</i>   | frameshift deletion        | NM_014026.6:c.666delC;p.C222fs    | -               | -                    | -           | -                               | H14;H18;H39;H40 | 4                    | 0                    |
| <i>EXOSC4</i> | frameshift deletion        | NM_019037.3:c.506delC;p.A169fs    | -               | -                    | -           | -                               | H32             | 1                    | 0                    |
| <i>GPAA1</i>  | frameshift deletion        | NM_003801.4:c.702delC;p.S234fs    | -               | -                    | -           | -                               | H21;H8          | 2                    | 0                    |
| <i>GPAA1</i>  | frameshift deletion        | NM_003801.4:c.639delG;p.Q213fs    | -               | -                    | -           | -                               | H31             | 1                    | 0                    |
| <i>GPAA1</i>  | nonsynonymous SNV          | NM_003801.4:c.G1387A;p.A463T      | Tolerated       | Damaging             | -           | -                               | H37             | 1                    | 0                    |
| <i>GRINA</i>  | frameshift insertion       | NM_000837.2:c.72_73insGC;p.G24fs  | -               | -                    | -           | -                               | H46             | 1                    | 0                    |
| <i>GRINA</i>  | nonsynonymous SNV          | NM_000837.2:c.C54A;p.N18K         | Deleterious     | Possible Damaging    | -           | -                               | H43             | 1                    | 0                    |
| <i>GRINA</i>  | frameshift deletion        | NM_000837.2:c.275delG;p.G92fs     | -               | -                    | -           | -                               | H14             | 1                    | 0                    |
| <i>GRINA</i>  | nonframeshift substitution | NM_000837.2:c.272_275AGGC         | -               | -                    | -           | -                               | H14             | 1                    | 0                    |
| <i>GRINA</i>  | nonframeshift substitution | NM_000837.2:c.87_88TG             | -               | -                    | -           | -                               | H39             | 1                    | 0                    |
| <i>HFE</i>    | nonsynonymous SNV          | NM_000410.4:c.G845A;p.C282Y       | Deleterious     | Damaging             | rs1800562   | Conflicting pathogenicity       | H2              | 1                    | 0                    |
| <i>LPA</i>    | nonsynonymous SNV          | NM_005577.4:c.A4195C;p.T1399P     | Deleterious     | Damaging             | rs41272110  | -                               | H14;H9          | 2                    | 0                    |

|               |                            |                                           |             |                   |             |        |                            |   |   |
|---------------|----------------------------|-------------------------------------------|-------------|-------------------|-------------|--------|----------------------------|---|---|
| <i>LPIN3</i>  | frameshift deletion        | NM_001301860.2:c.1197delC:p.F399fs        | -           | -                 | -           | -      | H40                        | 1 | 0 |
| <i>LPIN3</i>  | frameshift deletion        | NM_001301860.2:exon16:c.2010delG:p.Q670fs | -           | -                 | -           | -      | H31                        | 1 | 0 |
| <i>LPIN3</i>  | nonsynonymous SNV          | NM_001301860.2:c.C881T:p.P294L            | -           | Possible Damaging | -           | -      |                            | 1 | 0 |
| <i>MAF1</i>   | frameshift deletion        | NM_032272.5:c.532delG:p.G178fs            | -           | -                 | -           | -      | H18;H21;H25;H31;H35;H37;H8 | 7 | 0 |
| <i>MYLIP</i>  | nonsynonymous SNV          | NM_013262.4:c.C1210T:p.H404Y              | Deleterious | Damaging          | -           | -      | H17                        | 1 | 0 |
| <i>NYNRIN</i> | nonframeshift substitution | NM_025081.3:c.169_173GC                   | -           | -                 | -           | -      | H29;H31;H32;H33;H43        | 5 | 0 |
| <i>NYNRIN</i> | frameshift substitution    | NM_025081.3:c.169_173GGC                  | -           | -                 | -           | -      | H29;H31;H32;H33            | 4 | 0 |
| <i>NYNRIN</i> | nonframeshift substitution | NM_025081.3:c.167_172AGC                  | -           | -                 | -           | -      | H16;H22;H37;H40            | 4 | 0 |
| <i>NYNRIN</i> | frameshift deletion        | NM_025081.3:c.170_173del:p.57_58del       | -           | -                 | -           | -      | H17;H43                    | 2 | 0 |
| <i>NYNRIN</i> | nonframeshift deletion     | NM_025081.3:c.171_173del:p.57_58del       | -           | -                 | -           | -      | H17                        | 1 | 0 |
| <i>NYNRIN</i> | frameshift deletion        | NM_025081.3:c.5040delC:p.A1680fs          | -           | -                 | -           | -      | H18                        | 1 | 0 |
| <i>NYNRIN</i> | nonframeshift substitution | NM_025081.3:c.167_173AGGC                 | -           | -                 | -           | -      | H45                        | 1 | 0 |
| <i>NYNRIN</i> | nonframeshift substitution | NM_025081.3:c.5038_5042GCCAG              | -           | -                 | -           | -      | H22                        | 1 | 0 |
| <i>NYNRIN</i> | frameshift substitution    | NM_025081.3:c.167_173AGC                  | -           | -                 | -           | -      | H45                        | 1 | 0 |
| <i>NYNRIN</i> | frameshift insertion       | NM_025081.3:c.454_455insCG:p.R152fs       | -           | -                 | -           | -      | H29                        | 1 | 0 |
| <i>NYNRIN</i> | frameshift deletion        | NM_025081.3:c.168delG:p.E56fs             | -           | -                 | -           | -      | H12                        | 1 | 0 |
| <i>NYNRIN</i> | frameshift substitution    | NM_025081.3:c.5038_5042GCCA               | -           | -                 | -           | -      | H22                        | 1 | 0 |
| <i>OPLAH</i>  | frameshift substitution    | NM_017570.5:c.2189_2195GCCCCA             | -           | -                 | -           | -      | H17;H21;H40;H9             | 4 | 0 |
| <i>OPLAH</i>  | frameshift deletion        | NM_017570.5:c.3668delA:p.N1223fs          | -           | -                 | -           | -      | H31;H9                     | 2 | 0 |
| <i>OPLAH</i>  | nonsynonymous SNV          | NM_017570.5::c.C2568T:p.H856=             | -           | -                 | rs377155890 | Benign | H31                        | 1 | 0 |
| <i>OSBPL7</i> | frameshift deletion        | NM_145798.3:c.651_652del:p.217_218del     | -           | -                 | -           | -      | H15;H22;H25;H46;H9         | 5 | 0 |
| <i>OSBPL7</i> | nonframeshift substitution | NM_145798.3:c.348_352ACCCT                | -           | -                 | -           | -      | H29;H9                     | 2 | 0 |
| <i>OSBPL7</i> | frameshift substitution    | NM_145798.3:c.348_352GCCT                 | -           | -                 | -           | -      | H29;H9                     | 2 | 0 |
| <i>PARP10</i> | frameshift deletion        | NM_032789.5:c.146delG:p.G49fs             | -           | -                 | -           | -      | H37;H48;H8;H9              | 4 | 0 |
| <i>PARP10</i> | frameshift deletion        | NM_032789.5:c.527delG:p.G176fs            | -           | -                 | -           | -      | H21                        | 1 | 0 |
| <i>PARP10</i> | frameshift substitution    | NM_032789.5:c.16_20ACCA                   | -           | -                 | -           | -      | H33                        | 1 | 0 |
| <i>PARP10</i> | frameshift deletion        | NM_032789.5:c.2338delC:p.R780fs           | -           | -                 | -           | -      | H35                        | 1 | 0 |
| <i>PARP10</i> | frameshift deletion        | NM_032789.5:c.3053delT:p.L1018fs          | -           | -                 | -           | -      | H17                        | 1 | 0 |
| <i>PARP10</i> | frameshift deletion        | NM_032789.5:c.2634delG:p.R878fs           | -           | -                 | -           | -      | H40                        | 1 | 0 |
| <i>PLCG1</i>  | nonsynonymous SNV          | NM_002660.3:c.G3473A:p.R1158H             | Deleterious | Damaging          | rs141684852 | -      | H3                         | 1 | 0 |

|                                 |                            |                                    |             |                      |             |        |         |   |   |
|---------------------------------|----------------------------|------------------------------------|-------------|----------------------|-------------|--------|---------|---|---|
| <i>PLCG1</i>                    | frameshift deletion        | NM_002660.3:c.561delG;p.R187fs     | -           | -                    | -           | -      | H43     | 1 | 0 |
| <i>PLCG1</i>                    | nonsynonymous SNV          | NM_002660.3:c.G805C;p.G269R        | -           | -                    | -           | -      | H33     | 1 | 0 |
| <i>PVRL2/</i><br><i>NECTIN2</i> | nonsynonymous SNV          | NM_002856.3:c.G526C;p.D176H        | Deleterious | Possible<br>Damaging | rs146534542 | Benign | H12     | 1 | 0 |
| <i>PVRL2/</i><br><i>NECTIN2</i> | frameshift deletion        | NM_002856.3:c.1281delG;p.L427fs    | -           | -                    | -           | -      | H25     | 1 | 0 |
| <i>SHARPIN</i>                  | nonsynonymous SNV          | NM_030974.4:c.G1094A;p.R365H       | Deleterious | Damaging             | rs112552278 | Benign |         | 1 | 0 |
| <i>SHARPIN</i>                  | frameshift substitution    | NM_030974.4:c.610_614GCCT          | -           | -                    | -           | -      | H40     | 1 | 0 |
| <i>SORT1</i>                    | nonframeshift substitution | NM_002959.7:c.594_595CA            | -           | -                    | -           | -      | H32     | 1 | 0 |
| <i>SORT1</i>                    | frameshift deletion        | NM_002959.7:c.594delT;p.F198fs     | -           | -                    | -           | -      | H32     | 1 | 0 |
| <i>SPATC1</i>                   | nonsynonymous SNV          | NM_198572.3:c.C1504A;p.Q502K       | Deleterious | Damaging             | rs201925917 | -      | H21;H39 | 2 | 0 |
| <i>SPATC1</i>                   | frameshift deletion        | NM_198572.3:c.330delG;p.P110fs     | -           | -                    | -           | -      | H32     | 1 | 0 |
| <i>SPATC1</i>                   | frameshift deletion        | NM_198572.3:c.525delG;p.V175fs     | -           | -                    | -           | -      | H31     | 1 | 0 |
| <i>SPATC1</i>                   | frameshift deletion        | NM_198572.3:c.744delG;p.V248fs     | -           | -                    | -           | -      | H22     | 1 | 0 |
| <i>SPATC1</i>                   | nonframeshift substitution | NM_198572.3:c.329_330CA            | -           | -                    | -           | -      | H32     | 1 | 0 |
| <i>SPATC1</i>                   | stopgain SNV               | NM_198572.3:c.C1606T;p.R536X       | Tolerated   | -                    | rs373716422 | -      | H31     | 1 | 0 |
| <i>ST3GAL4</i>                  | nonsynonymous SNV          | NM_006278.3:c.C824T;p.A275V        | -           | -                    | -           | -      | H3      | 1 | 0 |
| <i>ST3GAL4</i>                  | nonsynonymous SNV          | NM_006278.3:c.G773A;p.G256D        | -           | -                    | -           | -      | H48     | 1 | 0 |
| <i>TOMM40</i>                   | frameshift deletion        | NM_001128917.2:c.240delG;p.P80fs   | -           | -                    | -           | -      | H33;H39 | 2 | 0 |
| <i>ZHX3</i>                     | frameshift deletion        | NM_001384315.1:c.1417delG;p.V473fs | -           | -                    | -           | -      | H35     | 1 | 0 |
| <i>ZHX3</i>                     | nonsynonymous SNV          | NM_001384315.1:c.C1232G;p.P411R,   | Tolerated   | Damaging             | -           | -      | H14     | 1 | 0 |

**Abbreviations:** LDL-C; low density lipoprotein, HDL; high LDL-C group, LLDL; low LDL-C group.



**Supplementary Table S6.** Summary of the 56 causative variants in 54 of tier-3 genes identified from whole-exome sequencing.

| Gene                  | Variant Type            | Nucleotide and amino acid changes         | SIFT prediction | Polyphen2 prediction | snp138      | Clinical Significance (ClinVar) | Sample IDs                                                            | Frequency in HLDL, n | Frequency in LLDL, n |
|-----------------------|-------------------------|-------------------------------------------|-----------------|----------------------|-------------|---------------------------------|-----------------------------------------------------------------------|----------------------|----------------------|
| <i>ACADVL</i>         | frameshift deletion     | NM_000018.4:c.74delC:p.T25fs              | -               | -                    | -           | -                               | H14;H17;H18;H21;H29;H31;H37;H39;H43;H45;H48                           | 11                   | 0                    |
| <i>AIM1L/CRYBG2</i>   | nonsynonymous SNV       | NM_001039775.4:c.G1430A:p.R477Q           | -               | -                    | rs201245727 | -                               | H14;H15;H17;H25;H31;H40;H43;H45;H8;H9                                 | 10                   | 0                    |
| <i>APOBEC3F</i>       | frameshift deletion     | NM_145298.6:c.840delC:p.C280fs            | -               | -                    | -           | -                               | H14;H15;H16;H18;H21;H25;H29;H2;H31;H35;H37;H43;H8;H9                  | 14                   | 0                    |
| <i>LOC100289470</i>   | nonsynonymous SNV       | NC_000005.10:g.179522780A>C               | -               | -                    | rs28420183  | -                               | H15;H16;H17;H18;H21;H22;H31;H40;H46;H48;H8                            | 11                   | 0                    |
| <i>C1orf85/GLMP</i>   | frameshift deletion     | NM_144580.3:c.35_36del:p.12_12del         | -               | -                    | -           | -                               | H14;H15;H16;H17;H18;H22;H25;H29;H31;H32;H33;H37;H40;H45;H48;H8;H9     | 17                   | 0                    |
| <i>CACNA1S</i>        | frameshift deletion     | NM_000069.3:c.1330delC:p.L444fs           | -               | -                    | -           | -                               | H14;H15;H18;H21;H25;H29;H37;H39;H48;H9                                | 10                   | 0                    |
| <i>CCDC108/CFAP65</i> | frameshift deletion     | NM_194302.4:c.977delG:p.G326fs            | -               | -                    | -           | -                               | H17;H18;H22;H25;H29;H35;H40;H45;H8;H9                                 | 10                   | 0                    |
| <i>CCDC168</i>        | nonsynonymous SNV       | NM_001146197.3:c.A8434C:p.T2812P          | -               | -                    | rs9585986   | -                               | H15;H17;H21;H22;H25;H29;H33;H35;H40;H46;H48;H8;H9                     | 13                   | 0                    |
| <i>CDH20</i>          | frameshift deletion     | NM_031891.4:c.2073delG:p.A691fs           | -               | -                    | -           | -                               | H14;H16;H18;H29;H33;H40;H43;H45;H46;H9                                | 10                   | 0                    |
| <i>CDK2</i>           | frameshift deletion     | NM_001798.5:c.662delC:p.T221fs            | -               | -                    | -           | -                               | H21;H22;H25;H31;H32;H35;H39;H40;H43;H46                               | 10                   | 0                    |
| <i>CNTNAP3B</i>       | nonsynonymous SNV       | NM_001201380.3:c.T1717G:p.C573G           | Deleterious     | -                    | rs76032838  | -                               | H16;H17;H21;H22;H29;H2;H32;H35;H37;H39;H40;H43;H45;H46                | 14                   | 0                    |
| <i>DDI1</i>           | frameshift deletion     | NM_001001711.3:c.788delC:p.A263fs         | -               | -                    | -           | -                               | H14;H16;H21;H25;H29;H31;H32;H37;H40;H43;H45;H48;H8;H9                 | 14                   | 0                    |
| <i>DNAH7</i>          | frameshift deletion     | NM_018897.3:c.9955_9956del:p.3319_3319del | -               | -                    | -           | -                               | H14;H17;H25;H29;H31;H37;H40;H43;H48;H8;H9                             | 11                   | 0                    |
| <i>DPCR1/MUCL3</i>    | frameshift deletion     | NM_080870.4:c.2453delC:p.S818fs           | -               | -                    | -           | -                               | H14;H15;H16;H17;H21;H22;H25;H29;H2;H31;H33;H35;H39;H45;H46;H9         | 16                   | 0                    |
| <i>EZH1</i>           | frameshift deletion     | NM_001991.5:c.579delG:p.G193fs            | -               | -                    | -           | -                               | H14;H16;H17;H22;H31;H37;H39;H40;H45;H48                               | 10                   | 0                    |
| <i>FAM114A1</i>       | frameshift deletion     | NM_138389.4:c.573delG:p.Q191fs            | -               | -                    | -           | -                               | H17;H21;H25;H31;H32;H35;H39;H40;H46;H8;H9                             | 11                   | 0                    |
| <i>FRG1BP</i>         | nonframeshift insertion | NR_145491.1:n.509TTG                      | -               | -                    | rs112430454 | -                               | H12;H15;H16;H17;H18;H21;H22;H25;H29;H35;H39;H40;H43;H45;H46;H48;H8;H9 | 18                   | 0                    |

|                      |                            |                                           |           |          |            |   |                                                               |    |   |
|----------------------|----------------------------|-------------------------------------------|-----------|----------|------------|---|---------------------------------------------------------------|----|---|
| <i>GBP7</i>          | frameshift deletion        | NM_207398.3:c.460delG;p.A154fs            | -         | -        | -          | - | H15;H16;H17;H18;H21;H31;H32;H35;H37                           | 16 | 0 |
| <i>GTF3C1</i>        | frameshift deletion        | NM_001520.4:c.167delG;p.G56fs             | -         | -        | -          | - | H39;H40;H43;H45;H48;H8;H9<br>H14;H17;H18;H21;H25;H32;H33;H37  | 15 | 0 |
| <i>HEATR5A</i>       | frameshift deletion        | NM_015473.4:c.2656delG;p.V886fs           | -         | -        | -          | - | H39;H40;H43;H45;H46;H48;H8<br>H15;H16;H17;H18;H21;H22;H25;H29 | 15 | 0 |
| <i>HEATR5A</i>       | nonframeshift substitution | NM_015473.4:c.2656_2657AT                 | -         | -        | -          | - | H31;H32;H33;H39;H46;H8;H9<br>H15;H16;H17;H18;H21;H22;H25;H29  | 15 | 0 |
| <i>ISLR2</i>         | frameshift deletion        | NM_001130136.1:c.1827delG;p.L609fs        | -         | -        | -          | - | H31;H32;H33;H39;H46;H8;H9<br>H15;H17;H18;H21;H22;H25;H2;H31;  | 11 | 0 |
| <i>ITGAX</i>         | frameshift deletion        | M_001286375.2:c.1271_1272del;p.424_424del | -         | -        | -          | - | H48;H8;H9<br>H14;H16;H17;H18;H21;H29;H2;H31;                  | 13 | 0 |
| <i>KBTD12</i>        | frameshift deletion        | NM_207335.4:c.159delC;p.S53fs             | -         | -        | -          | - | H33;<br>H39;H40;H43;H9<br>H14;H15;H16;H18;H21;H22;H2;H31;     | 11 | 0 |
| <i>KCNQ3</i>         | stopgain SNV               | NM_004519.4:c.1702delA;p.I568X            | -         | -        | -          | - | H39;H48;H8<br>H14;H15;H18;H29;H31;H40;H43;H45                 | 11 | 0 |
| <i>KEAP1</i>         | frameshift deletion        | NM_203500.2:c.966delC;p.P322fs            | -         | -        | -          | - | ;H48;H8;H9<br>H14;H15;H16;H17;H18;H21;H22;H25                 | 18 | 0 |
| <i>KIAA2018/USF3</i> | frameshift deletion        | NM_001009899.4:c.4589delG;p.G1530fs       | -         | -        | -          | - | ;H2;H31;H32<br>H37;H39;H40;H43;H45;H48;H8                     | 10 | 0 |
| <i>KMT2C</i>         | nonsynonymous SNV          | NM_170606.3:c.C871T;p.L291F               | Tolerated | Damaging | rs56850341 | - | H14;H21;H22;H25;H29;H31;H32;H33<br>;H37;H40                   | 11 | 0 |
| <i>KMT2D</i>         | frameshift deletion        | NM_003482.4:c.8418delG;p.G2806fs          | -         | -        | -          | - | H15;H17;H22;H29;H35;H39;H40;H45<br>;H46;H8;H9                 | 11 | 0 |
| <i>LAMC3</i>         | frameshift deletion        | NM_006059.4:c.4505delC;p.A1502fs          | -         | -        | -          | - | H14;H16;H17;H18;H25;H31;H33;H39<br>;H40;H43;H46               | 12 | 0 |
| <i>MICALL2</i>       | frameshift deletion        | NM_182924.4:c.2260delC;p.L754fs           | -         | -        | -          | - | H14;H17;H18;H21;H22;H25;H37;H39                               | 11 | 0 |
| <i>MTUS2</i>         | frameshift deletion        | NM_001033602.4:c.1730delC;p.S577fs        | -         | -        | -          | - | ;H45;H8;H9<br>H15;H16;H17;H18;H21;H31;H32;H35                 | 14 | 0 |
| <i>MUC12</i>         | nonsynonymous SNV          | NM_001164462.2:c.A5251C;p.T1751P          | Tolerated | -        | rs71557212 | - | ;H39;<br>H40;H45;H48;H8;H9<br>H15;H16;H17;H21;H22;H25;H29;H31 | 17 | 0 |
|                      |                            |                                           |           |          |            |   | ;H35<br>H37;H39;H40;H43;H45;H46;H8;H9                         |    |   |

|                |                         |                                          |           |          |           |   |                                                                       |    |   |
|----------------|-------------------------|------------------------------------------|-----------|----------|-----------|---|-----------------------------------------------------------------------|----|---|
| <i>MUC4</i>    | frameshift deletion     | NM_018406.7:c.13180delC:p.P4394fs        | -         | -        | -         | - | H14;H17;H18;H21;H25;H29;H32;H39;H40;H9                                | 10 | 0 |
| <i>NLRP14</i>  | frameshift deletion     | NM_176822.4:c.638delT:p.V213fs           | -         | -        | -         | - | H17;H21;H22;H31;H32;H33;H39;H3;H43;H45;H46                            | 11 | 0 |
| <i>OVCH2</i>   | frameshift deletion     | NM_198185.7:c.1239delG:p.G413fs          | -         | -        | -         | - | H21;H22;H29;H31;H32;H33;H35;H40;H43;H45;H48;H8;H9                     | 13 | 0 |
| <i>PIGR</i>    | nonsynonymous SNV       | NM_002644.4:c.G1093A:p.G365S             | Tolerated | Damaging | rs2275531 | - | H15;H17;H21;H29;H33;H39;H45;H46;H48;H9                                | 10 | 0 |
| <i>PLD4</i>    | frameshift deletion     | NM_001308174.2:c.53delC:p.A18fs          | -         | -        | -         | - | H14;H15;H16;H17;H31;H35;H39;H40;H43;H45;H46                           | 11 | 0 |
| <i>PSD4</i>    | frameshift deletion     | NM_012455.3:c.362delC:p.A121fs           | -         | -        | -         | - | H15;H18;H21;H22;H25;H35;H45;H48;H8;H9                                 | 10 | 0 |
| <i>PTPRCAP</i> | frameshift deletion     | NM_005608.3:c.419delC:p.P140fs           | -         | -        | -         | - | H17;H21;H22;H25;H29;H31;H32;H46;H48;H8;H9                             | 11 | 0 |
| <i>PUF60</i>   | frameshift deletion     | NM_078480.3:c.163delG:p.G55fs            | -         | -        | -         | - | H18;H21;H25;H32;H35;H40;H43;H46;H8;H9                                 | 10 | 0 |
| <i>RNF212</i>  | nonsynonymous SNV       | NM_001193318.3:c.A784G:p.I262V           | Tolerated | -        | rs1670534 | - | H14;H15;H16;H17;H18;H21;H25;H29;H31;H33;H35;H37;H40;H43;H8;H9         | 16 | 0 |
| <i>RNMT</i>    | frameshift substitution | NM_001308263.2:c.926_930GCCT             | -         | -        | -         | - | H17;H18;H22;H25;H33;H37;H39;H40;H46;H8;H9                             | 11 | 0 |
| <i>RYR1</i>    | frameshift deletion     | NM_000540.3:c.813delC:p.S271fs           | -         | -        | -         | - | H15;H16;H18;H21;H22;H25;H39;H40;H43;H9                                | 10 | 0 |
| <i>SEC13</i>   | frameshift deletion     | NM_183352.3:c.950delG:p.G317fs           | -         | -        | -         | - | H14;H15;H16;H17;H18;H21;H22;H29;H31;H32;H33;H35;H37;H40;H43;H46;H8;H9 | 18 | 0 |
| <i>SGCE</i>    | frameshift deletion     | NM_001099401.2:c.783delA:p.K261fs        | -         | -        | -         | - | H18;H25;H31;H33;H39;H40;H43;H45;H46;H48;H8;H9                         | 12 | 0 |
| <i>SH3D19</i>  | frameshift deletion     | NM_001009555.4:c.555_556del:p.185_186del | -         | -        | -         | - | H14;H15;H21;H31;H32;H35;H37;H40;H48;H8                                | 10 | 0 |
| <i>SLC35F6</i> | frameshift deletion     | NM_017877.4:c.911delG:p.W304fs           | -         | -        | -         | - | H14;H15;H17;H29;H32;H35;H45;H46;H8;H9                                 | 10 | 0 |
| <i>SPATA21</i> | stopgain SNV            | NM_198546.1:c.790delC:p.L264X            | -         | -        | -         | - | H14;H18;H21;H25;H29;H33;H43;H48;H8;H9                                 | 10 | 0 |
| <i>TIAM2</i>   | nonsynonymous SNV       | NM_012454.4:c.G995A:p.R332H              | Tolerated | Damaging | rs931312  | - | H15;H16;H17;H18;H21;H22;H25;H29;H33;H35;H37;H40;H45;H9                | 14 | 0 |

|                 |                     |                                  |   |   |   |   |                                                                                      |    |   |
|-----------------|---------------------|----------------------------------|---|---|---|---|--------------------------------------------------------------------------------------|----|---|
| <i>TIMELESS</i> | frameshift deletion | NM_003920.5:c.3280delG;p.A1094fs | - | - | - | - | H14;H15;H17;H18;H21;H22;H29;H31<br>H32;H35;H39;H40;H45;H46;H8                        | 15 | 0 |
| <i>TNR</i>      | frameshift deletion | NM_003285.3:c.1951delG;p.A651fs  | - | - | - | - | H15;H17;H18;H21;H22;H25;H31;H39<br>;H40;H9                                           | 10 | 0 |
| <i>UBR1</i>     | frameshift deletion | NM_174916.3:c.4519delC;p.P1507fs | - | - | - | - | H17;H18;H21;H22;H25;H31;H32;H33<br>;H35<br>H37;H39;H40;H43;H46;H48;H8;H9             | 17 | 0 |
| <i>WDR74</i>    | frameshift deletion | NM_018093.3:c.855delC;p.A285fs   | - | - | - | - | H14;H15;H16;H17;H18;H21;H22;H25<br>;H31;H32<br>H37;H39;H40;H43;H45;H46;H48;H8;<br>H9 | 19 | 0 |
| <i>WDR90</i>    | frameshift deletion | NM_145294.5:c.4701delG;p.Q1567fs | - | - | - | - | H14;H15;H17;H21;H29;H31;H32<br>H37;H39;H40;H43;H48;H8;H9                             | 14 | 0 |
| <i>ZNF687</i>   | frameshift deletion | NM_001304763.2:c.3delG;p.M1fs    | - | - | - | - | H14;H18;H21;H22;H25;H29;H33<br>H35;H37;H40;H46;H48;H8                                | 13 | 0 |

---

**Abbreviations:** LDL-C; low density lipoprotein, HDL; high LDL-C group, LLDL; low LDL-C group.

**Supplementary Table S7.** Summary of the 17 protective variants in tier-1 genes identified from whole-exome sequencing.

| Gene           | Variant Type               | Nucleotide and amino acid changes       | SIFT prediction | Polyphen2 prediction | snp138       | Clinical Significance (ClinVar) | Sample IDs  | Frequency in HDL, n | Frequency in LDL, n |
|----------------|----------------------------|-----------------------------------------|-----------------|----------------------|--------------|---------------------------------|-------------|---------------------|---------------------|
| <i>APOB</i>    | nonsynonymous SNV          | NM_000384.3:c.G7331A:p.R2444H           | Tolerated       | Benign               | rs200143030  | Conflicting pathogenicity       | L49;L4      | 0                   | 2                   |
| <i>APOB</i>    | nonsynonymous SNV          | NM_000384.3:c.G4163A:p.R1388H           | Tolerated       | Benign               | rs13306187   | Conflicting pathogenicity       | L49;L4      | 0                   | 2                   |
| <i>APOB</i>    | nonsynonymous SNV          | NM_000384.3:c.G10913A:p.R3638Q          | Tolerated       | Benign               | rs1801701    | -                               | L19         | 0                   | 1                   |
| <i>APOB</i>    | stopgain SNV               | NM_000384.3:c.T387A:p.Y129X             | Deleterious     | -                    | -            | -                               | L24         | 0                   | 1                   |
| <i>APOB</i>    | nonsynonymous SNV          | NM_000384.3:c.C4274G:p.S1425C           | Deleterious     | Possible Damaging    | -            | -                               | L38         | 0                   | 1                   |
| <i>APOB</i>    | synonymous SNV             | NM_000384.3:c.C5430T:p.N1810=           | -               | -                    | rs1352777306 | -                               | L4          | 0                   | 1                   |
| <i>APOB</i>    | synonymous SNV             | NM_000384.3:c.C3219T:p.L1073=           | -               | -                    | rs750588820  | Likely benign                   | L11         | 0                   | 1                   |
| <i>APOB</i>    | stopgain SNV               | NM_000384.3:c.C8240G:p.S2747X           | Deleterious     | -                    | -            | -                               | L11         | 0                   | 1                   |
| <i>APOB</i>    | stopgain SNV               | NM_000384.3:c.T5340G:p.Y1780X           | Tolerated       | -                    | -            | -                               | L49         | 0                   | 1                   |
| <i>LDLR</i>    | synonymous SNV             | NM_000527.5:c.C1725T:p.L575=            | -               | -                    | rs1799898    | Benign/Likely benign            | L27;L45     | 0                   | 2                   |
| <i>LDLRAP1</i> | nonframeshift substitution | NM_015627.3:c.603_604CC                 | -               | -                    | -            | -                               | L46         | 0                   | 1                   |
| <i>PCSK9</i>   | nonsynonymous SNV          | NM_174936.4:c.C277T:p.R93C              | Tolerated       | Damaging             | rs151193009  | Conflicting pathogenicity       | L13;L19;L40 | 0                   | 3                   |
| <i>PCSK9</i>   | frameshift deletion        | NM_174936.4:c.83delC:p.A28fs            | -               | -                    | -            | -                               | L11;L27     | 0                   | 2                   |
| <i>PCSK9</i>   | nonframeshift insertion    | NM_174936.4:c.42_43insCTG:p.P14delinsPL | -               | -                    | -            | -                               | L28;L42     | 0                   | 2                   |
| <i>PCSK9</i>   | synonymous SNV             | NM_174936.4:c.C141T:p.S47=              | -               | -                    | rs28385701   | Conflicting pathogenicity       | L8          | 0                   | 1                   |
| <i>PCSK9</i>   | synonymous SNV             | NM_174936.4:c.C993T:p.P331=             | -               | -                    | rs376753957  | Benign/Likely benign            | L38         | 0                   | 1                   |
| <i>PCSK9</i>   | synonymous SNV             | NM_174936.4:c.C351T:p.G117=             | -               | -                    | -            | -                               | L25         | 0                   | 1                   |

**Abbreviations:** LDL-C; low density lipoprotein, HDL; high LDL-C group, LDL; low LDL-C group.

**Supplementary Table S8.** Summary of the 62 protective variants in 10 tier-2 genes identified from whole-exome sequencing.

| Gene          | Variant Type            | Nucleotide and amino acid change               | SIFT prediction | Polyphen2 prediction | snp138       | Clinical Significance (ClinVar) | Sample IDs     | Frequency in HLDL, n | Frequency in LLDL, n |
|---------------|-------------------------|------------------------------------------------|-----------------|----------------------|--------------|---------------------------------|----------------|----------------------|----------------------|
| <i>CELSR2</i> | frameshift deletion     | NM_001408.3:c.1505delC:p.A502fs                | -               | -                    | -            | -                               | L38;L8         | 0                    | 2                    |
| <i>CELSR2</i> | nonsynonymous SNV       | NM_001408.3:c.G6340A:p.A2114T                  | Tolerated       | Possible Damaging    | rs375166359  | -                               | L13            | 0                    | 1                    |
| <i>CELSR2</i> | nonsynonymous SNV       | NM_001408.3:c.G8642C:p.R2881P                  | Tolerated       | Benign               | rs761753467  | -                               | L27            | 0                    | 1                    |
| <i>CELSR2</i> | frameshift deletion     | NM_001408.3:c.3524delC:p.A1175fs               | -               | -                    | -            | -                               | L28            | 0                    | 1                    |
| <i>CELSR2</i> | frameshift deletion     | NM_001408.3:c.3528delC>T:p.P1176fs             | -               | -                    | -            | -                               | L14            | 0                    | 1                    |
| <i>CELSR2</i> | synonymous SNV          | NM_001408.3:c.C3534G:p.G1178G                  | -               | -                    | -            | -                               | L49            | 0                    | 1                    |
| <i>CELSR2</i> | frameshift deletion     | NM_001408.3:c.8086delC:p.P2696fs               | -               | -                    | -            | -                               | L24            | 0                    | 1                    |
| <i>CELSR2</i> | synonymous SNV          | NM_001408.3:c.G5364A:p.E1788E                  | -               | -                    | rs767874482  | -                               | L45            | 0                    | 1                    |
| <i>CELSR2</i> | synonymous SNV          | NM_001408.3:c.A8628G:p.G2876G                  | -               | -                    | rs441853     | -                               | L39            | 0                    | 1                    |
| <i>CELSR2</i> | nonsynonymous SNV       | NM_001408.3:c.C2084T:p.T695M                   | Tolerated       | Damaging             | rs117469174  | -                               | L25            | 0                    | 1                    |
| <i>CELSR2</i> | nonsynonymous SNV       | NM_001408.3:c.G425T:p.R142L                    | Tolerated       | Benign               | -            | -                               | L49            | 0                    | 1                    |
| <i>CELSR2</i> | frameshift deletion     | NM_001408.3:c.8085_8086del:p.2695_2696 del     | -               | -                    | -            | -                               | L49            | 0                    | 1                    |
| <i>CELSR2</i> | nonsynonymous SNV       | NM_001408.3:c.C8417T:p.A2806V                  | Tolerated       | Benign               | rs77619489   | -                               | L42            | 0                    | 1                    |
| <i>CELSR2</i> | synonymous SNV          | NM_001408.3:c.G780A:p.T260T                    | -               | -                    | rs372864529  | -                               | L13            | 0                    | 1                    |
| <i>CELSR2</i> | nonsynonymous SNV       | NM_001408.3: c.5134C>AG: p. P1712A             | Tolerated       | Benign               | rs1455877280 | -                               | L25            | 0                    | 1                    |
| <i>CELSR2</i> | nonsynonymous SNV       | NM_001408.3:c.G1792A:p.V598M                   | Deleterious     | Benign               | rs117684956  | -                               | L25            | 0                    | 1                    |
| <i>DCPS</i>   | synonymous SNV          | NM_014026.6:c.G558A:p.A186A                    | -               | -                    | rs188471699  | Benign                          | L42            | 0                    | 1                    |
| <i>DCPS</i>   | nonsynonymous SNV       | NM_014026.6:c.C947T:p.T316M                    | Deleterious     | Possible Damaging    | rs137941190  | Pathogenic/ Likely pathogenic   | L43            | 0                    | 1                    |
| <i>DCPS</i>   | nonframeshift insertion | NM_014026.6:c.215_216insTGGGGA:p.S72 delinsSGD | -               | -                    | rs201095573  | -                               | L26            | 0                    | 1                    |
| <i>GPAA1</i>  | frameshift deletion     | NM_003801.4:c.739delC:p.P247fs                 | -               | -                    | -            | -                               | L23            | 0                    | 1                    |
| <i>LPA</i>    | frameshift deletion     | NM_005577.4:c.3148delG:p.G1050fs               | -               | -                    | -            | -                               | L23;L39;L49;L8 | 0                    | 4                    |
| <i>LPA</i>    | frameshift insertion    | NM_005577.4:c.3147dupC:p.G1050fs               | -               | -                    | -            | -                               | L23;L39;L49;L8 | 0                    | 4                    |

|                |                         |                                         |             |          |              |        |                            |   |   |
|----------------|-------------------------|-----------------------------------------|-------------|----------|--------------|--------|----------------------------|---|---|
| <i>LPA</i>     | nonsynonymous SNV       | NM_005577.4:c.A5673G:p.I1891M           | Deleterious | Damaging | rs3798220    | Benign | L14;L26;L35                | 0 | 3 |
| <i>LPA</i>     | synonymous SNV          | NM_005577.4:c.C2826T:p.H942H            | -           | -        | rs117174672  | -      | L26;L39                    | 0 | 2 |
| <i>LPA</i>     | nonsynonymous SNV       | NM_005577.4:c.C2945T:p.A982V            | -           | Damaging | rs139937718  | -      | L25                        | 0 | 1 |
| <i>MAF1</i>    | frameshift deletion     | NM_032272.5:c.715delG:p.G239fs          | -           | -        | -            | -      | L46                        | 0 | 1 |
| <i>NYNRI N</i> | frameshift substitution | NM_025081.3:c.167_172AGGGC              | -           | -        | -            | -      | L14;L19;L26;L38;L39;L46;L8 | 0 | 7 |
| <i>NYNRI N</i> | frameshift deletion     | NM_025081.3:c.2247delG:p.E749fs         | -           | -        | -            | -      | L28;L43;L50                | 0 | 3 |
| <i>NYNRI N</i> | frameshift deletion     | NM_025081.3:c.168_169del:p.56_57del     | -           | -        | -            | -      | L43;L50                    | 0 | 2 |
| <i>NYNRI N</i> | frameshift deletion     | NM_025081.3:c.169delG:p.G57fs           | -           | -        | -            | -      | L43;L50                    | 0 | 2 |
| <i>NYNRI N</i> | frameshift deletion     | NM_025081.3:c.2249delG:p.G750fs         | -           | -        | -            | -      | L13;L27                    | 0 | 2 |
| <i>NYNRI N</i> | frameshift deletion     | NM_025081.3:c.1216_1217del:p.406_406del | -           | -        | -            | -      | L2                         | 0 | 1 |
| <i>NYNRI N</i> | frameshift deletion     | NM_025081.3:c.3338delC:p.A1113fs        | -           | -        | -            | -      | L40                        | 0 | 1 |
| <i>NYNRI N</i> | synonymous SNV          | NM_025081.3:c.G5445A:p.R1815=           | -           | -        | rs1355473794 | -      | L26                        | 0 | 1 |
| <i>NYNRI N</i> | synonymous SNV          | NM_025081.3:c.G4590A:p.K1530K           | -           | -        | rs368816036  | -      | L45                        | 0 | 1 |
| <i>NYNRI N</i> | nonframeshift deletion  | NM_025081.3:c.2247_2249del:p.749_750del | -           | -        | -            | -      | L13                        | 0 | 1 |
| <i>NYNRI N</i> | frameshift deletion     | NM_025081.3:c.143delC:p.T48fs           | -           | -        | -            | -      | L40                        | 0 | 1 |
| <i>NYNRI N</i> | nonsynonymous SNV       | NM_025081.3:c.T4946C:p.F1649S           | Deleterious | Damaging | -            | -      | L24                        | 0 | 1 |
| <i>NYNRI N</i> | synonymous SNV          | NM_025081.3:c.G1485A:p.P495P            | -           | -        | rs12897153   | -      | L14                        | 0 | 1 |
| <i>NYNRI N</i> | frameshift deletion     | NM_025081.3:c.1217delG:p.G406fs         | -           | -        | -            | -      | L2                         | 0 | 1 |
| <i>NYNRI N</i> | nonsynonymous SNV       | NM_025081.3:c.C3320G:p.A1107G           | Tolerated   | Benign   | -            | -      | L11                        | 0 | 1 |
| <i>OPLAH</i>   | synonymous SNV          | NM_017570.5:c.C1989T:p.T663=            | -           | -        | -            | -      | L40;L45                    | 0 | 2 |
| <i>OPLAH</i>   | frameshift deletion     | NM_017570.5:c.2608delC:p.H870fs         | -           | -        | -            | -      | L49                        | 0 | 1 |
| <i>OPLAH</i>   | nonsynonymous SNV       | NM_017570.5:c.G1973T:p.R658L            | Tolerated   | Benign   | rs148181675  | Benign | L14                        | 0 | 1 |

|               |                            |                                           |           |          |             |   |         |   |   |
|---------------|----------------------------|-------------------------------------------|-----------|----------|-------------|---|---------|---|---|
| <i>OPLAH</i>  | nonsynonymous SNV          | NM_017570.5:c.G364A:p.A122T               | Tolerated | Damaging | rs199914741 | - | L46     | 0 | 1 |
| <i>OPLAH</i>  | synonymous SNV             | NM_017570.5:c.C195T:p.L65L                | -         | -        | -           | - | L9      | 0 | 1 |
| <i>OPLAH</i>  | nonsynonymous SNV          | NM_017570.5:c.C1793G:p.A598G              | Tolerated | Benign   | -           | - | L40     | 0 | 1 |
| <i>OSBPL7</i> | frameshift substitution    | NM_145798.3:c.1185_1189TGGA               | -         | -        | -           | - | L4      | 0 | 1 |
| <i>OSBPL7</i> | nonframeshift substitution | NM_145798.3:c.1185_1189CGGGA              | -         | -        | -           | - | L4      | 0 | 1 |
| <i>OSBPL7</i> | synonymous SNV             | NM_145798.3:c.C189T:p.N63N                | -         | -        | rs140138342 | - | L2      | 0 | 1 |
| <i>PARP10</i> | frameshift deletion        | NM_032789.5:c.538delG;p.D180fs            | -         | -        | -           | - | L27;L43 | 0 | 2 |
| <i>PARP10</i> | synonymous SNV             | NM_032789.5:c.G2214A:p.T738=              | -         | -        | rs370075141 | - | L8      | 0 | 1 |
| <i>PARP10</i> | frameshift deletion        | NM_032789.5:c.2096delC;p.P699fs           | -         | -        | -           | - | L49     | 0 | 1 |
| <i>PARP10</i> | frameshift deletion        | NM_032789.5:c.2011delG;p.A671fs           | -         | -        | -           | - | L24     | 0 | 1 |
| <i>PARP10</i> | nonsynonymous SNV          | NM_032789.5:c.G3059C:p.G1020A             | Tolerated | Benign   | -           | - | L26     | 0 | 1 |
| <i>PARP10</i> | nonframeshift substitution | NM_032789.5:c.3050_3052CTC                | -         | -        | -           | - | L10     | 0 | 1 |
| <i>PARP10</i> | frameshift deletion        | NM_032789.5:c.3050_3051del:p.1017_1017del | -         | -        | -           | - | L10     | 0 | 1 |
| <i>SPATC1</i> | frameshift deletion        | NM_198572.3:c.785delC;p.P262fs            | -         | -        | -           | - | L24;L8  | 0 | 2 |
| <i>SPATC1</i> | nonsynonymous SNV          | NM_198572.3:c.T193C:p.S65P                | Tolerated | Benign   | rs60050811  | - | L26;L46 | 0 | 2 |
| <i>SPATC1</i> | nonsynonymous SNV          | NM_198572.3:c.C785T:p.P262L               | Tolerated | Benign   | rs145229001 | - | L19     | 0 | 1 |
| <i>SPATC1</i> | nonsynonymous SNV          | NM_198572.3:c.G1651A:p.V551M              | Tolerated | Benign   | rs370797939 | - | L40     | 0 | 1 |
| <i>SPATC1</i> | synonymous SNV             | NM_198572.3:c.C288G:p.P96P                | -         | -        | rs374114772 | - | L27     | 0 | 1 |

**Abbreviations:** LDL-C; low density lipoprotein, HDL; high LDL-C group, LDL; low LDL-C group.



**Supplementary Table S9.** Summary of the 23 protective variants in 23 tier-3 genes identified from whole-exome sequencing.

| Gene             | Variant Type            | Nucleotide and amino acid change           | SIFT prediction | Polyphen2 prediction | snp138      | Clinical Significance (ClinVar) | Sample IDs                                         | Frequency in HDL, n | Frequency in LDL, n |
|------------------|-------------------------|--------------------------------------------|-----------------|----------------------|-------------|---------------------------------|----------------------------------------------------|---------------------|---------------------|
| <i>ACIN1</i>     | frameshift deletion     | NM_014977.3:c.2411delG;p.G804fs            | -               | -                    | -           | -                               | L11;L27;L2;L38;L40;L46;L49;L4;L50;L8               | 0                   | 10                  |
| <i>AGAP1</i>     | frameshift deletion     | NM_001037131.3:c.380_381del;p.127_127del   | -               | -                    | -           | -                               | L19;L24;L26;L27;L2;L42;L45;L46;L4;L8               | 0                   | 10                  |
| <i>BMP1</i>      | frameshift deletion     | NM_006129.5:c.2442delG;p.K814fs            | -               | -                    | -           | -                               | L11;L13;L19;L27;L28;L35;L40;L42;L43;L45;L49;L4;L50 | 0                   | 13                  |
| <i>CASC3</i>     | frameshift deletion     | NM_007359.5:c.173delC;p.A58fs              | -               | -                    | -           | -                               | L23;L25;L26;L27;L28;L2;L35;L38;L43;L45;L4;L50;L8   | 0                   | 13                  |
| <i>CPEB3</i>     | frameshift deletion     | NM_014912.5:c.258delT;p.P86fs              | -               | -                    | -           | -                               | L11;L13;L14;L19;L26;L27;L28;L2;L42;L8              | 0                   | 10                  |
| <i>CPSF1</i>     | nonsynonymous SNV       | NM_013291.3:c.937+22C>T                    | -               | -                    | rs141140965 | -                               | L10;L11;L13;L24;L2;L35;L42;L43;L45;L46             | 0                   | 10                  |
| <i>CYP4F8</i>    | frameshift deletion     | NM_007253.4:c.555delC;p.G185fs             | -               | -                    | -           | -                               | L14;L26;L27;L2;L35;L38;L42;L43;L50;L8              | 0                   | 10                  |
| <i>EWSR1</i>     | frameshift substitution | NM_013986.4:c.1286_1289AGC                 | -               | -                    | -           | -                               | L19;L24;L28;L2;L35;L38;L42;L43;L4;L50;L9           | 0                   | 11                  |
| <i>HNF1A</i>     | frameshift deletion     | NM_001306179.2:c.1124_1125del;p.375_375del | -               | -                    | -           | -                               | L14;L19;L26;L2;L35;L38;L42;L43;L45;L46;L50         | 0                   | 11                  |
| <i>IGSF3</i>     | nonsynonymous SNV       | NM_001542.4:c.C1345T;p.R449C               | Deleterious     | Damaging             | rs968366784 | -                               | L10;L13;L14;L24;L27;L39;L40;L42;L43;L50            | 0                   | 10                  |
| <i>KCP</i>       | frameshift deletion     | NM_199349.3:c.46delG;p.A16fs               | -               | -                    | rs11335250  | -                               | L11;L13;L19;L24;L26;L27;L28;L39;L42;L43;L49        | 0                   | 11                  |
| <i>KHSRP</i>     | frameshift deletion     | NM_003685.3:c.1122_1123del;p.374_375del    | -               | -                    | -           | -                               | L19;L24;L28;L2;L35;L38;L43;L46;L50;L8              | 0                   | 10                  |
| <i>KIDINS220</i> | frameshift deletion     | NM_020738.4:c.4199delG;p.G1400fs           | -               | -                    | -           | -                               | L19;L24;L26;L28;L2;L35;L38;L42;L45;L8              | 0                   | 10                  |
| <i>MAP7D2</i>    | frameshift deletion     | NM_001168465.2:c.2010delC;p.A670fs         | -               | -                    | -           | -                               | L19;L23;L27;L28;L35;L38;L43;L50;L8;L9              | 0                   | 10                  |
| <i>MOC52</i>     | frameshift deletion     | NM_176806.4:c.252delC;p.P22fs              | -               | -                    | -           | -                               | L13;L26;L28;L2;L35;L38;L42;L43;L46;L8;L9           | 0                   | 11                  |

|                 |                        |                                       |   |   |             |   |                                                             |   |    |
|-----------------|------------------------|---------------------------------------|---|---|-------------|---|-------------------------------------------------------------|---|----|
| <i>MYO7B</i>    | frameshift deletion    | NM_001080527.2:c.5331delG;p.T177fs    | - | - | -           | - | L13;L14;L19;L27;L28;L2;L38retry;L42;L43;L4;L50;L9           | 0 | 12 |
| <i>OTOP1</i>    | nonframeshift deletion | NM_177998.3:c.310_318del;p.104_106del | - | - | rs111245977 | - | L13;L14;L26;L27;L28;L35;L38;L39;L43;L45;L46;L50;L9          | 0 | 13 |
| <i>SHANK1</i>   | frameshift deletion    | NM_016148.5:c.1714delG;p.E572fs       | - | - | -           | - | L10;L13;L14;L19;L26;L27;L28;L35;L38;L39;L42;L43;L45;L50;L8  | 0 | 15 |
| <i>SIPA1</i>    | frameshift deletion    | NM_153253.30:c.856delC;p.P286fs       | - | - | -           | - | L19;L26;L27;L28;L2;L35;L38;L39;L42;L43;L45;L46;L4;L50;L8;L9 | 0 | 16 |
| <i>SLC2A13</i>  | frameshift deletion    | NM_052885.4:c.469delC;p.L157fs        | - | - | -           | - | L10;L19;L25;L26;L27;L28;L38;L39;L42;L43;L45;L46;L49;L50;L8  | 0 | 15 |
| <i>SLC2A4RG</i> | frameshift deletion    | NM_020062.4:c.48delG;p.L16fs          | - | - | -           | - | L19;L24;L26;L28;L2;L35;L38retry;L42;L46;L50;L8;L9           | 0 | 12 |
| <i>SNX32</i>    | frameshift deletion    | NM_152760.3:c.141+64delG              | - | - | rs11327250  | - | L13;L14;L26;L27;L2;L35;L38;L42;L43;L45;L50;L9               | 0 | 12 |
| <i>TAS2R19</i>  | stoploss SNV           | NM_176888.2:c.A900G;p.X300W           | - | - | rs79475879  | - | L11;L13;L19;L23;L24;L28;L35;L38;L39;L42;L43                 | 0 | 11 |

\* **Abbreviations:** LDL-C; low density lipoprotein, HDL; high LDL-C group, LDL; low LDL-C group.

**Supplementary Table S10.** Multiple logistic regression models of non-genetic risk factors associated with HDL in males and females.

| Non-genetic Risk Factor                | Male              |         | Female            |         |
|----------------------------------------|-------------------|---------|-------------------|---------|
|                                        | aOR (95%CI)       | p-value | aOR (95%CI)       | p-value |
| Age (years)                            | NIL               |         | 1.07 (1.03, 1.10) | <0.001* |
| Fasting blood glucose (mmol/L)         | NIL               |         | 1.23 (1.12, 1.36) | <0.001* |
| Ever-use of tobacco products (Yes)     | 1.90 (1.06, 3.37) | 0.030*  | NIL               |         |
| Diabetes with medication status (Yes)  | 0.43 (0.24, 0.79) | 0.006*  | 0.17 (0.08, 0.36) | <0.001* |
| Family history of hyperlipidemia (Yes) | NIL               |         | NIL               |         |
| Hyperlipidemia with medication (Yes)   | NIL               |         | 3.58 (1.99, 6.45) | <0.001* |
| Nagelkerke's R <sup>2</sup>            | 0.07              |         | 0.14              |         |
| AUC (95%CI)                            | 0.61 (0.54, 0.69) |         | 0.69 (0.65, 0.74) |         |

\* p-value < 0.05, Abbreviations: aOR, adjusted odds ratio; 95%CI, 95% confidence interval; AUC, area under the curve.

**Supplementary Table S11.** Multiple logistic regression models of genetic risk factors associated with HDL in males and females.

| Genetic Risk Factor         | Male               |         | Female             |         |
|-----------------------------|--------------------|---------|--------------------|---------|
|                             | aOR (95%CI)        | p-value | aOR (95%CI)        | p-value |
| <i>T2FH_OSBPL7_01</i>       | 14.9 (4.23, 52.42) | <0.001* | 32.0 (3.18, 322.1) | 0.003*  |
| <i>T2FH_SPATC1_01</i>       | 0.20 (0.05, 0.78)  | 0.02*   | NIL                |         |
| rs151193009                 | 0.12 (0.02, 0.57)  | 0.008*  | 0.05 (0.003, 0.68) | 0.03*   |
| Nagelkerke's R <sup>2</sup> | 0.17               |         | 0.17               |         |
| AUC (95%CI)                 | 0.61 (0.54, 0.68)  |         | 0.60 (0.55, 0.66)  |         |

\* p-value < 0.05, Abbreviations: aOR, adjusted odds ratio; 95%CI, 95% confidence interval; AUC, area under the curve.
